# Supplementary material for: Synthesis of Thymidine Phosphorylase Inhibitor Based on Quinoxaline Derivatives and Their Molecular Docking Study
Source: PubMed Central journal article supplement (PMC6471342; doi:10.3390/molecules24061002), 2019-03-13
Supplement: molecules-24-01002-s001.pdf [file molecules-24-01002-s001.pdf]

| S.No. | Structure                                                                         | IC <sub>50</sub> (μM ± SEM <sup>a</sup> ) | SMILES                                                          |
|-------|-----------------------------------------------------------------------------------|-------------------------------------------|-----------------------------------------------------------------|
| 1     | 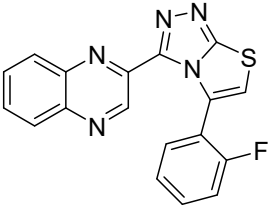 | 13.60 ± 0.4                               | <chem>FC1=CC=CC=C1C5=CSC4=NN=C(N45)C3=NC2=CC=CC=C2N=C3</chem>   |
| 2     |  | 26.10 ± 0.70                              | <chem>FC1=CC(C5=CSC4=NN=C(N45)C3=NC2=CC=CC=C2N=C3)=CC=C1</chem> |

|   |                                                                                    |              |                                                                  |
|---|------------------------------------------------------------------------------------|--------------|------------------------------------------------------------------|
| 3 | 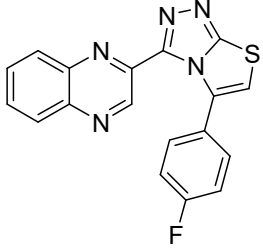  | 18.10 ± 0.50 | <chem>FC(C=C5)=CC=C5C4=CSC3=NN=C(N34)C2=NC1=CC=CC=C1N=C2</chem>  |
| 4 |   | 27.40 ± 0.60 | <chem>ClC1=CC=CC=C1C5=CSC4=NN=C(N45)C3=NC2=CC=CC=C2N=C3</chem>   |
| 5 |  | 33.40 ± 0.80 | <chem>ClC1=CC(C5=CSC4=NN=C(N45)C3=NC2=CC=CC=C2N=C3)=CC=C1</chem> |

|   |                                                                                    |              |                                                                                                                    |
|---|------------------------------------------------------------------------------------|--------------|--------------------------------------------------------------------------------------------------------------------|
| 6 | 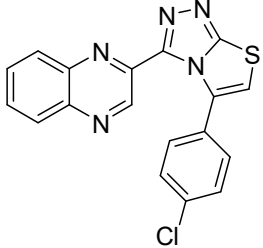  | 24.40 ± 0.60 | <chem>C1C(C=C5)=CC=C5C4=CSC3=NN=C(N34)C2=NC1=CC=CC=C2</chem>                                                       |
| 7 |   | 34.70 ± 0.80 | <chem>O=[N+](C1=CC=CC=C1C5=CSC4=NN=C(N45)C3=NC2=CC=CC=C2N=C3)[O-]</chem>                                           |
| 8 |  | 47.50 ± 0.90 | <chem>O=[N+](C(C=C5)=CC=C5C4=CSC3=NN=C(N34)C2=NC1=CC=CC=C1N=C2)[O-]</chem><br><p style="text-align: center;">I</p> |

|    |                                                                                     |              |                                                    |
|----|-------------------------------------------------------------------------------------|--------------|----------------------------------------------------|
| 9  | 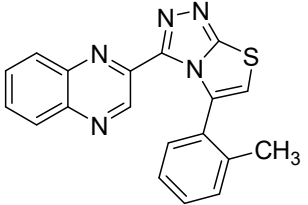   | 56.40 ± 1.20 | CC1=CC=CC=C1C5=CSC4=NN=C(N45)C3=NC2=CC=CC=C2N=C3   |
| 10 |    | N. A.        | CC1=CC(C5=CSC4=NN=C(N45)C3=NC2=CC=CC=C2N=C3)=CC=C1 |
| 11 |    | N. A.        | CC(C=C5)=CC=C5C4=CSC3=NN=C(N34)C2=NC1=CC=CC=C1N=C2 |
| 12 |  | 33.20 ± 0.75 | OC1=CC(C5=CSC4=NN=C(N45)C3=NC2=CC=CC=C2N=C3)=CC=C1 |

|    |                                                                                    |              |                                                                  |
|----|------------------------------------------------------------------------------------|--------------|------------------------------------------------------------------|
| 13 | 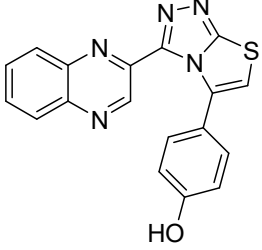  | 18.30 ± 0.55 | <chem>OC(C=C5)=CC=C5C4=CSC3=NN=C(N34)C2=NC1=CC=CC=C1N=C2-</chem> |
| 14 |   | 13.20 ± 0.40 | <chem>OC(C=C5O)=CC=C5C4=CSC3=NN=C(N34)C2=NC1=CC=CC=C1N=C2</chem> |
| 15 |  | 15.20 ± 0.50 | <chem>OC1=CC=C(O)C=C1C5=CSC4=NN=C(N45)C3=NC2=CC=CC=C2N=C3</chem> |

|    |                                                                                    |              |                                                                     |
|----|------------------------------------------------------------------------------------|--------------|---------------------------------------------------------------------|
| 16 | 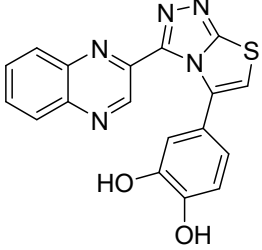  | 3.50 ± 0.20  | <chem>OC1=C(O)C=CC(C5=CSC4=NN=C(N45)C3=NC2=CC=CC=C2N=C3)=C1</chem>  |
| 17 |   | 24.20 ± 0.70 | <chem>OC1=CC(OC)=CC=C1C5=CSC4=NN=C(N45)C3=NC2=CC=CC=C2N=C3</chem>   |
| 18 |  | 16.90 ± 0.60 | <chem>COC(C(O)=C5)=CC=C5C4=CSC3=NN=C(N34)C2=NC1=CC=CC=C1N=C2</chem> |

|    |                                                                                    |              |                                                                   |
|----|------------------------------------------------------------------------------------|--------------|-------------------------------------------------------------------|
| 19 | 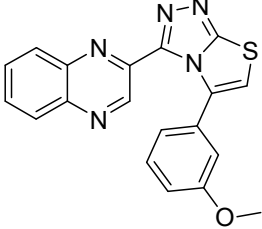  | N. A.        | <chem>COC1=CC(C5=CSC4=NN=C(N45)C3=NC2=CC=CC=C2N=C3)=CC=C1</chem>  |
| 20 |   | N. A.        | <chem>COC(C=C5)=CC=C5C4=CSC3=NN=C(N34)C2=NC1=CC=CC=C1N=C2</chem>  |
| 21 |  | 26.20 ± 0.50 | <chem>OC1=CC=C(OC)C=C1C5=CSC4=NN=C(N45)C3=NC2=CC=CC=C2N=C3</chem> |

|    |                                                                                    |              |                                                                |
|----|------------------------------------------------------------------------------------|--------------|----------------------------------------------------------------|
| 22 | 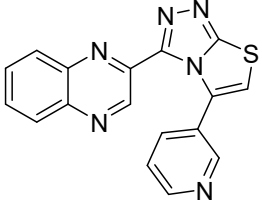  | N. A.        | <chem>C12=CC=CC=C1N=C(C3=NN=C4N3C(C5=CC=CN=C5)=CS4)C=N2</chem> |
| 23 |   | N. A.        | <chem>C12=CC=CC=C1N=C(C3=NN=C4N3C(C5=CC=NC=C5)=CS4)C=N2</chem> |
| 24 |  | 13.10 ± 0.30 | <chem>OC1=CC=CC=C1C5=CSC4=NN=C(N45)C3=NC2=CC=CC=C2N=C3</chem>  |



|             |                                                                                   |              |                                                                  |
|-------------|-----------------------------------------------------------------------------------|--------------|------------------------------------------------------------------|
| 25          | 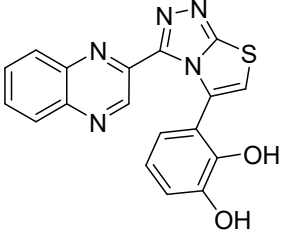 | 3.20 ± 0.10  | <chem>OC1=C(O)C=CC=C1C5=CSC4=NN=C(N45)C3=NC2=CC=CC=C2N=C3</chem> |
| Std<br>Drug |  | 38.68 ± 4.42 | <chem>OC(N1)=NC2=C(C=CN2)C1=O</chem>                             |

N.A = not Active; Sem<sup>a</sup> = Standard error Mean
